# Supplementary material for: The Acute Toxicity of Mineral Fibres: A Systematic In Vitro Study Using Different THP-1 Macrophage Phenotypes
Source: MDPI journal article supplement (doi:10.3390/ijms23052840), 2022-03-04
Supplement: s1 [file s1]

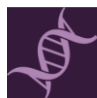

Article

# The Acute Toxicity of Mineral Fibres: A Systematic In Vitro Study Using Different THP-1 Macrophage Phenotypes

Serena Mirata <sup>1,2</sup> Vanessa Almonti <sup>2,3</sup>, Dario Di Giuseppe <sup>4</sup>, Laura Fornasini <sup>5</sup>, Simona Raneri <sup>5</sup>,  
Stefania Vernazza <sup>2,3</sup>, Danilo Bersani <sup>6</sup>, Alessandro F. Gualtieri <sup>4</sup>, Anna Maria Bassi <sup>2,3</sup> and Sonia Scarfi <sup>1,2,\*</sup>

<sup>1</sup> Department Earth, Environment and Life Sciences, University of Genova, 16132 Genova, Italy; serenamira94@gmail.com

<sup>2</sup> Inter-University Center for the Promotion of the 3Rs Principles in Teaching & Research (Centro 3R), 56122 Pisa, Italy

<sup>3</sup> Department Experimental Medicine, University of Genova, 16132 Genova, Italy; vanessaalmonti@gmail.com (V.A.); stefania.vernazza@yahoo.it (S.V.); anna.maria.bassi@unige.it (A.M.B.)

<sup>4</sup> Department of Chemical and Geological Sciences, University of Modena and Reggio Emilia, Via G. Campi 103, I-41125 Modena, Italy; dario.digiuseppe@unimore.it (D.D.G.); alessandro.gualtieri@unimore.it (A.F.G.)

<sup>5</sup> ICCOM-CNR—Institute of Chemistry of OrganoMetallic Compounds, National Research Council, Via G. Moruzzi 1, 56124 Pisa, Italy; laura.fornasini@pi.iccom.cnr.it (L.F.); simona.raneri@pi.iccom.cnr.it (S.R.)

<sup>6</sup> Department of Mathematical, Physical and Computer Sciences, University of Parma, Parco Area delle Scienze 7/A, 43124 Parma, Italy; danilo.bersani@unipr.it

\* Correspondence: soniascarfi@unige.it; Tel.: 0039-010-335-0227

## Supplementary materials and methods:

The following mineral fibres have been selected for the study:

1) UICC standard crocidolite (South African, NB #4173-111-3) with chemical formula  $(\text{Na}_{1.96}\text{Ca}_{0.03}\text{K}_{0.01})_2(\text{Fe}^{2+}_{2.34}\text{Fe}^{3+}_{2.05}\text{Mg}_{0.52})_{4.91}(\text{Si}_{7.84}\text{Al}_{0.02})_{7.86}\text{O}_{21.4}(\text{OH})_{2.64}$  [48]. Sample contain minor (<1 wt%) impurities of hematite, magnetite, and quartz. This mineral fibre has been widely used as a positive control in numerous in vitro and in vivo studies [49, 80–82]. Full characterisation of the sample is available in the following works: Gualtieri et al. [48] and Pacella et al. [36].

2) Chrysotile from Balangero (Torino, Italy) with chemical formula  $(\text{Mg}_{5.81}\text{Fe}^{2+}_{0.15}\text{Al}_{0.27}\text{Fe}^{3+}_{0.09}\text{Cr}_{0.01})_{6.33}\text{Si}_{3.97}\text{O}_{10}(\text{OH})_{7.11}$  [32]. Sample contain minor impurities of antigorite, balangeroite, calcite, clinocllore, diopside, dolomite, magnetite, microcline, plagioclase, talc. Complete characterisation of the sample is available in Pollastri et al. [32] and Gualtieri et al. [48]. The cyto-genotoxicity of chrysotile from Balangero has recently been studied in the work of Gualtieri et al. [14].

3) Fibrous erionite-Na from Jersey (Nevada USA)  $[(\text{Na}_{5.35}\text{K}_{2.19}\text{Ca}_{0.15}\text{Mg}_{0.11}\text{Ti}_{0.05})_{7.85}(\text{Si}_{28.01}\text{Al}_{7.90})_{35.91}\text{O}_{72.28}\cdot 13\text{H}_2\text{O}]$  with traces of clinoptilolite [28]. Complete characterisation of the sample is available in Pollastri et al. [32] and Gualtieri et al. [28].

### Supplementary Figures

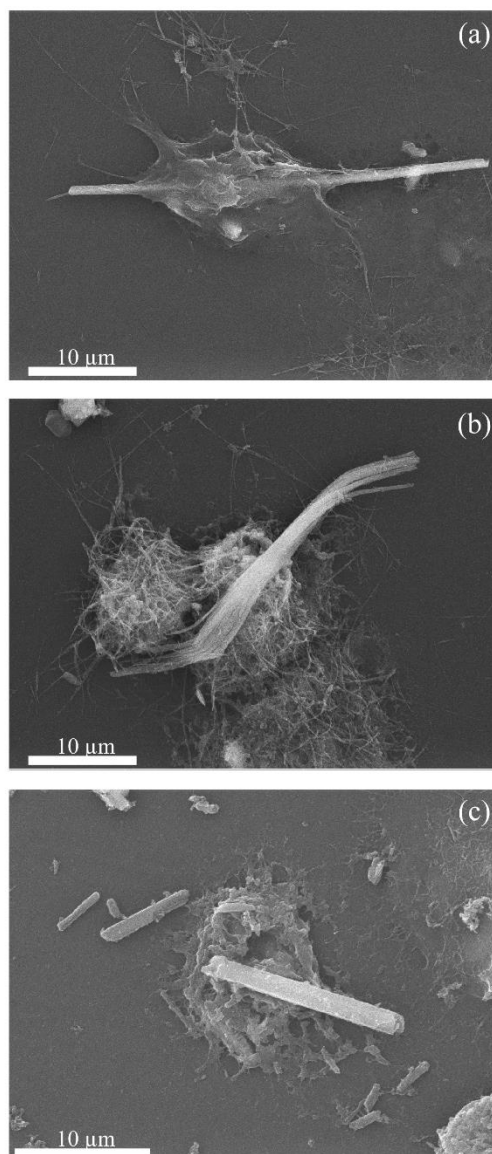

**Figure S1.** High-resolution FEG-SEM microphotographs of (a) M0-THP-1 cell interacting with a crocidolite fibre, (b) M0-THP-1 cell interacting with a chrysotile fibre, (c) M0-THP-1 cell interacting with an erionite fibre.
